# Supplementary material
Source: PubMed Central journal article supplement (PMC3477521)
Supplement: NIHMS407196-supplement-1_si_001.pdf [file NIHMS407196-supplement-1_si_001.pdf]

## Supporting Information

# Circularly Polarized Luminescence of Curium: A New Characterization of the 5f Actinide Complexes

Ga-Lai Law,<sup>‡,1</sup> Christopher M. Andolina,<sup>‡,1</sup> Jide Xu,<sup>1</sup> Vinh Luu,<sup>3</sup> Philip X. Rutkowski,<sup>2</sup> Gilles Muller,<sup>3</sup> David K. Shuh,<sup>2</sup> John K. Gibson,<sup>2</sup> Kenneth N. Raymond.<sup>\*,1,2</sup>

### AUTHORS ADDRESSES

<sup>1</sup> Department of Chemistry, University of California, Berkeley, California 94720-1460.

<sup>2</sup> Chemical Sciences Division, Lawrence Berkeley National Laboratory, Berkeley, California 94720

<sup>3</sup> Department of Chemistry, San José State University, One Washington Square, San José, California, 95192-0101

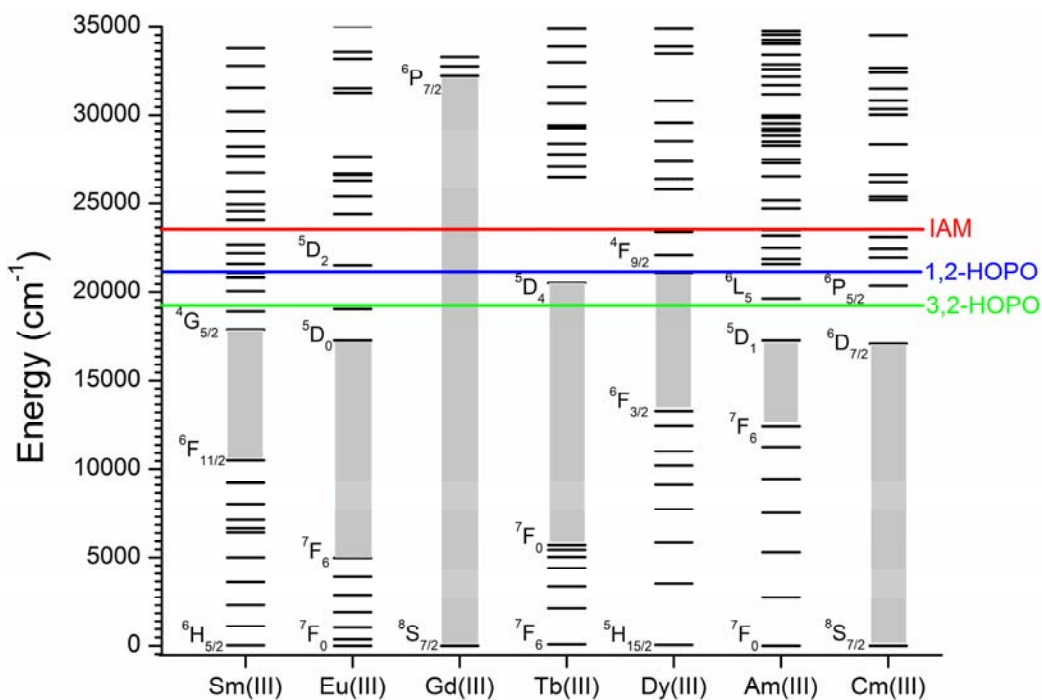

Figure S1. A diagram showing energy levels of selected lanthanides,<sup>14</sup> actinides<sup>5,6</sup> and the triplet state energy of three chelator/chromophores (7-9) used in our laboratory. The gray bar indicates the energy gap between the ground manifold and the excited states. The term symbols in the text (e.g.  $^5D_{7/2}$ ) are primed to indicate that the Russell-Saunders's coupling scheme is not strictly valid for the actinides, because of the comparable strength of the spin-orbit and electron-electron interactions.<sup>(11-13)</sup>

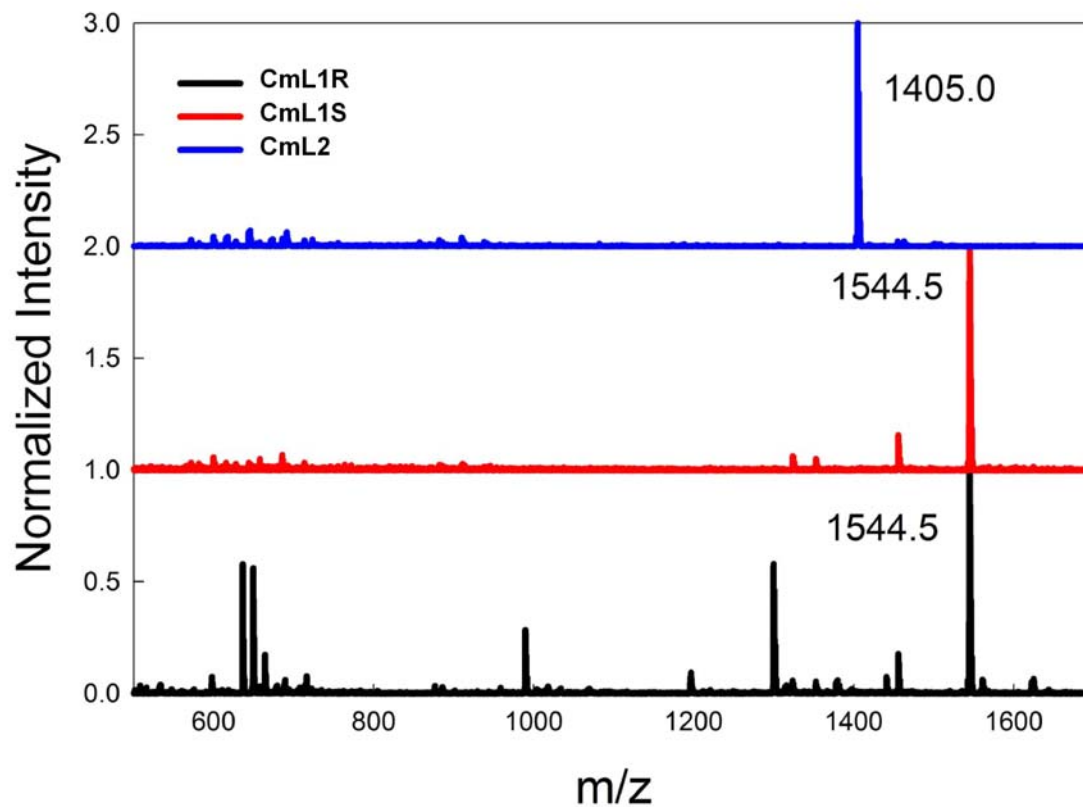

Figure S2. Normalized mass spectra of the three complexes CmL1R, CmL1S, and CmL2.

#### REFERENCES

- (1) Carnall, W. T.; Fields, P. R.; Rajnak, K. *The Journal of Chemical Physics* **1968**, *49*, 4424.
- (2) Carnall, W. T.; Fields, P. R.; Rajnak, K. *The Journal of Chemical Physics* **1968**, *49*, 4443.
- (3) Carnall, W. T.; Fields, P. R.; Rajnak, K. *The Journal of Chemical Physics* **1968**, *49*, 4447.
- (4) Carnall, W. T.; Fields, P. R.; Rajnak, K. *The Journal of Chemical Physics* **1968**, *49*, 4450.
- (5) Carnall, W. T.; Rajnak, K. *The Journal of Chemical Physics* **1975**, *63*, 3510.
- (6) Pappalardo, R. G.; Carnall, W. T.; Fields, P. R. *The Journal of Chemical Physics* **1969**, *51*, 1182.
